# Supplementary material for: Clinical and Molecular Characterization of Patients with Fructose 1,6-Bisphosphatase Deficiency
Source: Int J Mol Sci. 2017 Apr 18;18(4):857. doi: 10.3390/ijms18040857 (PMC5412439; doi:10.3390/ijms18040857)
Supplement: Supplementary file 1 [file ijms-18-00857-s001.pdf]

**Table S1.** The sequencing quality metrics of four cases included in this study.

| Patient | Total Reads | Average read depth<br>(×) | Percent of ROI with<br>20× (%) | Percent of ROI with<br>1× (%) | Unaligned reads | Off target percent of reads (%) | Total SNVs | Non-synonymous SNVs |
|---------|-------------|---------------------------|--------------------------------|-------------------------------|-----------------|---------------------------------|------------|---------------------|
| Case 1  | 113,198,302 | 146                       | 96.4                           | 99.9                          | 565,990         | 35.5%                           | 6456       | 5698                |
| Case 2  | 107,309,066 | 140                       | 95.7                           | 99.8                          | 493,621         | 36.4%                           | 5287       | 3778                |
| Case 3  | 124,999,609 | 163                       | 96.8                           | 99.8                          | 999,998         | 33.0%                           | 5605       | 4050                |
| Case 4  | 114,539,275 | 152                       | 96.3                           | 99.9                          | 801,775         | 34.7%                           | 5362       | 3827                |

ROI: region of interest

**Table S1.** (Continued).

| SNPs of SNVs | Total Indels | Prioritized by Ingenuity |
|--------------|--------------|--------------------------|
| 5387         | 282          | 105                      |
| 4576         | 161          | 97                       |
| 4726         | 201          | 108                      |
| 4596         | 180          | 94                       |

**Table S2.** Primers used in amplifying exons and the flanking sequences of *FBP1*.

| Exon | Forward Primer(5'-3')      | Reverse Primer(5'-3')       | Product Size (bp) |
|------|----------------------------|-----------------------------|-------------------|
| 3    | TGACAGTACAAATAAATAAGACCCAC | TGAGATACAAATCTACTTCAGTCTCAC | 358               |
| 4    | GGAAGGCTGCCGTGATAATC       | CTCCACATACCCCTGCCAAT        | 408               |
| 5    | GCTCGTCATCTCTCCACCTT       | AGAACTTCATCGTGGGCTCA        | 418               |
| 6    | GTGCTCGGTGAATGGATGTG       | TCGTCTGACCGTTTCATTCT        | 464               |
| 7    | CCACCAGCTCTGCATGTTTT       | TTTGGTTAGGGAGTGCC           | 452               |

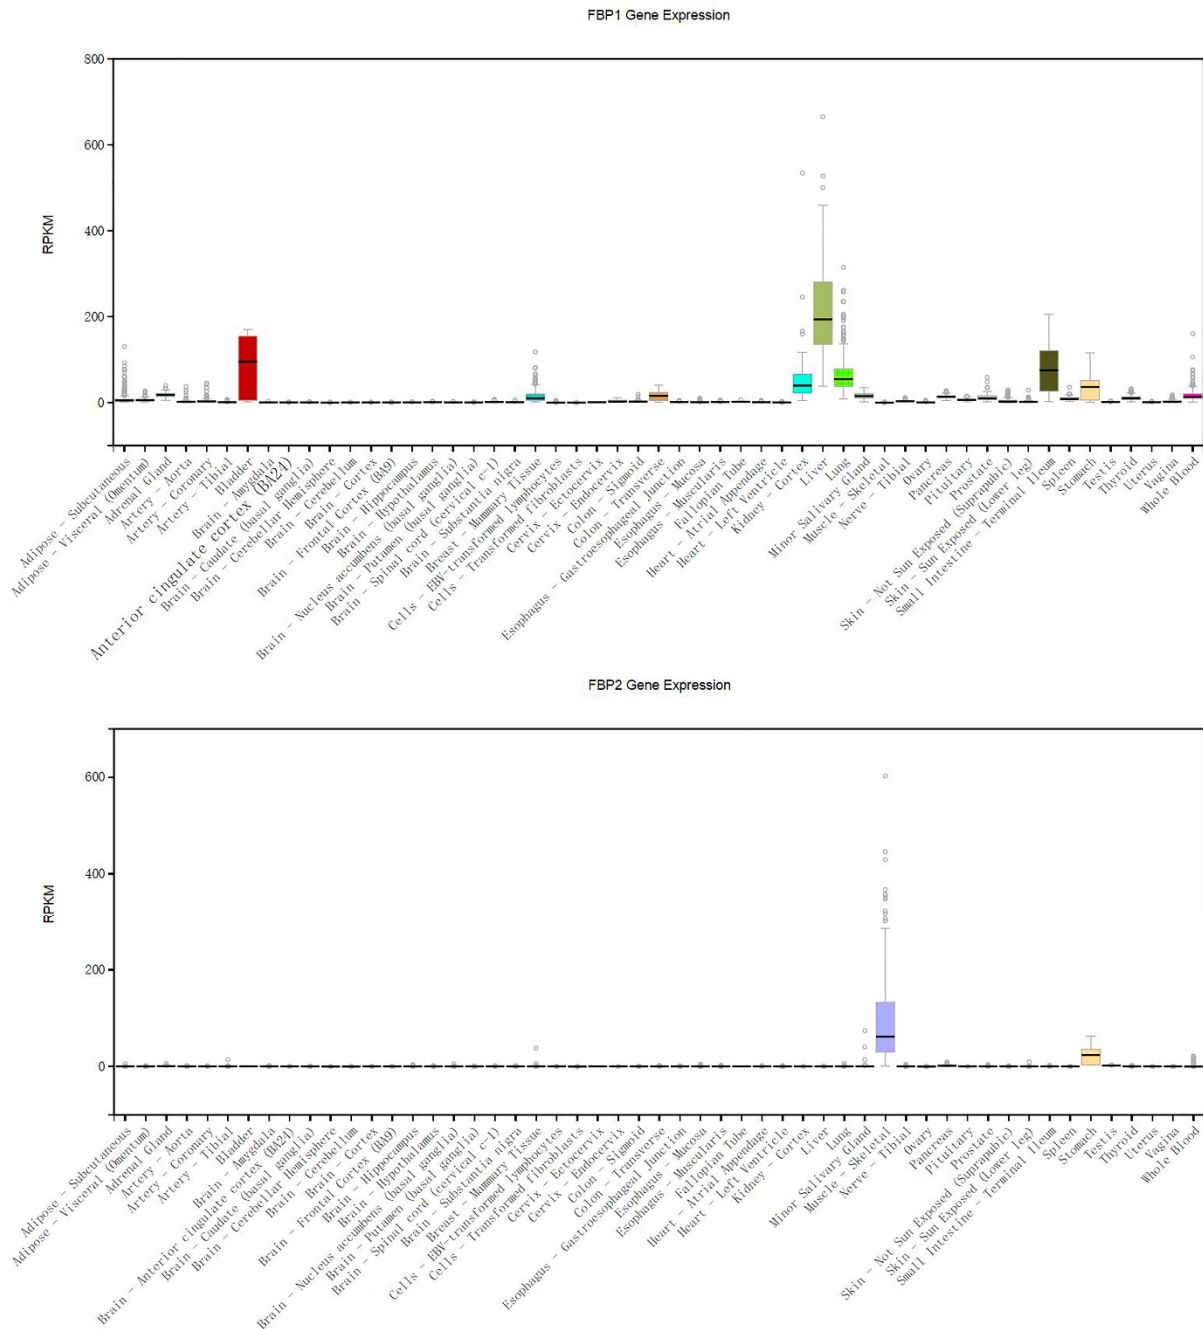

**Figure S1.** Expression pattern for FBP1 and FBP2 among the various tissues from GTEx Portal database. (A) The FBP1 protein mainly expresses in the liver, bladder, small intestine, kidney, lung, and stomach; (B) The FBP2 protein mainly expresses in the muscle and stomach.



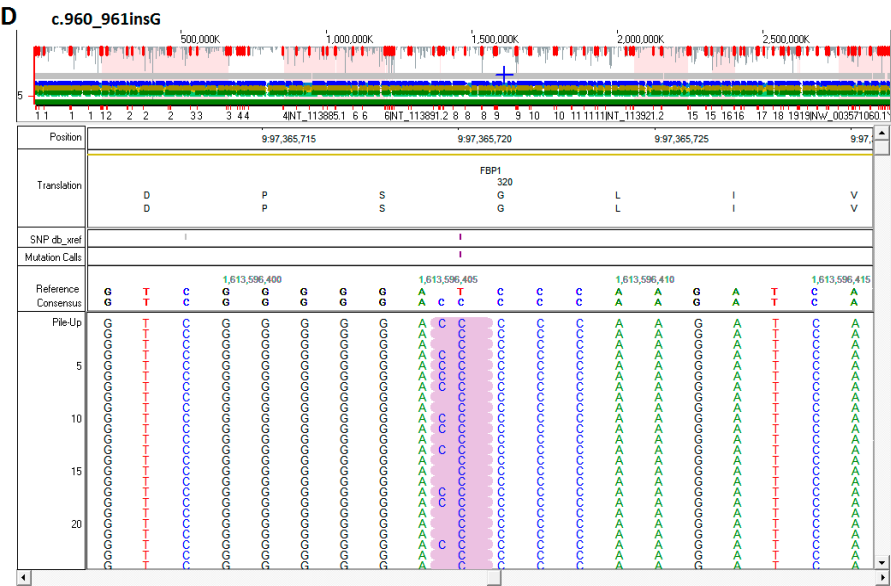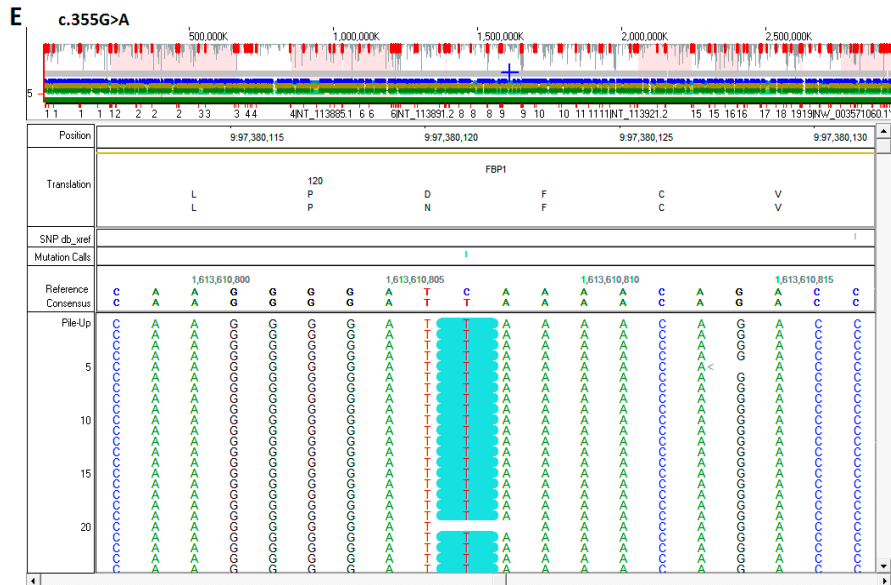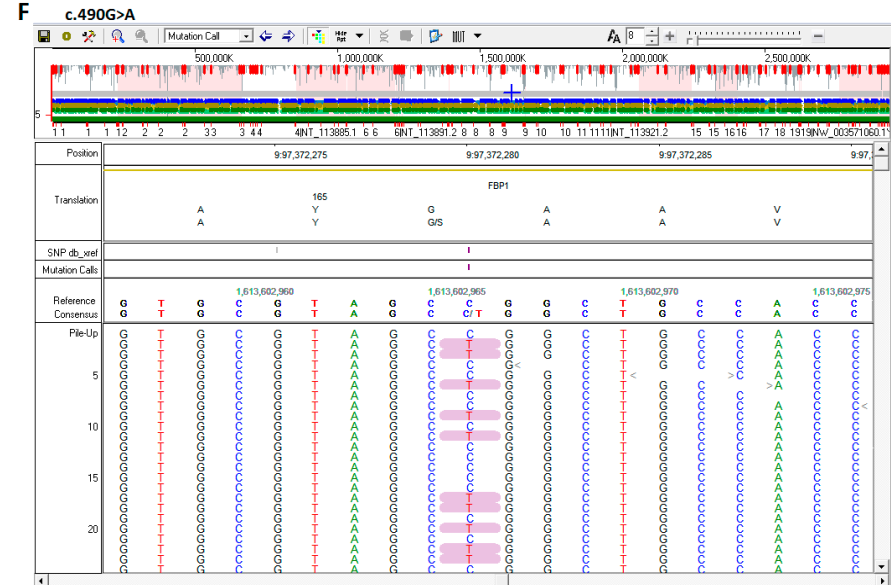

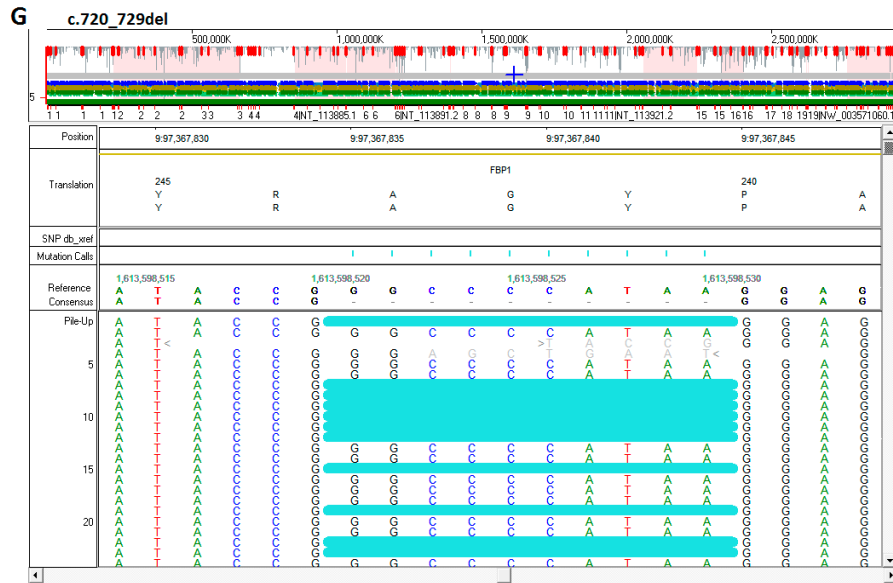

**Figure S2.** Reads alignment in the mutated positions for all the cases. Sequence alignment was performed by the NextGENe® software. (A, B), (C, D), (E), and (F, G) indicate the reads alignment in the mutated positions for case 1, 2, 3, and 4, respectively.

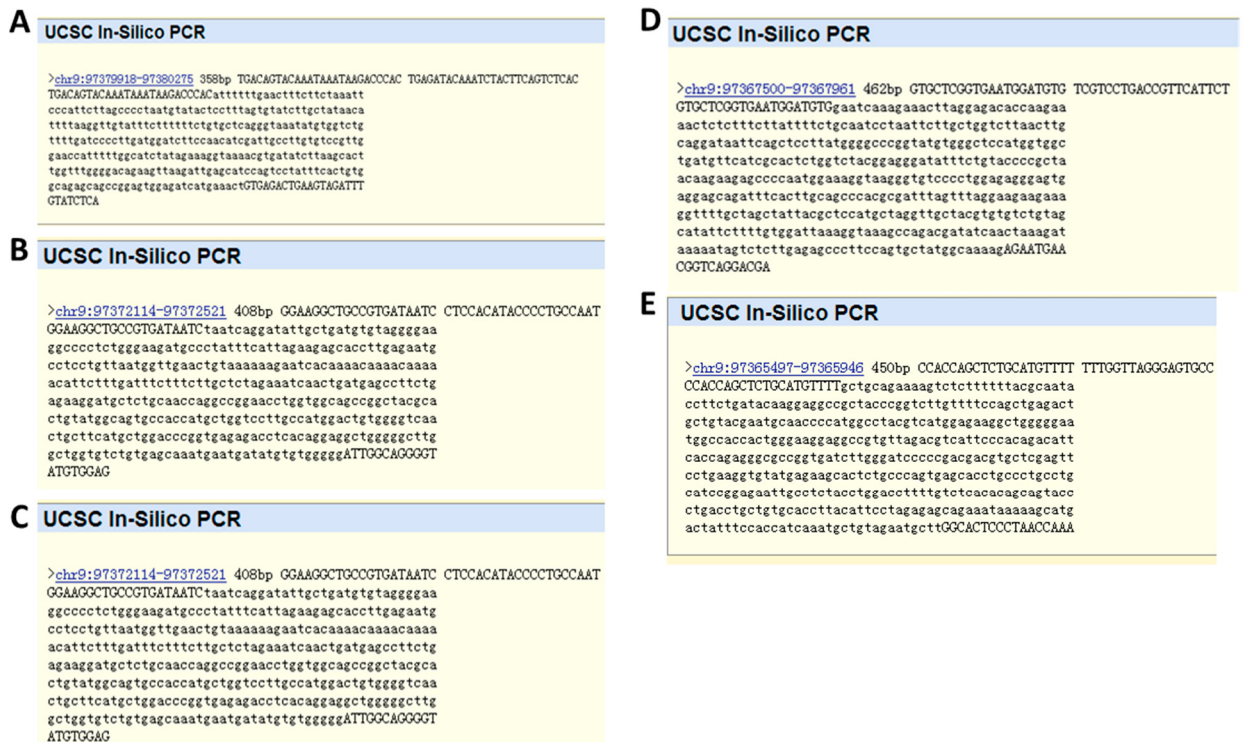

**Figure S3.** *In-silico* analysis of the primers. The effectiveness analysis of the five pair of primers to amplify the exon 3-7 of FBPI gene were performed by UCSC (<http://genome.ucsc.edu>). The analysis results showed that all the primers are appropriate (A–E).
